# Supplementary material for: Oxygen-induced changes to selectivity-determining steps in electrocatalytic CO2 reduction
Source: Royal Society of Chemistry journal article supplement (doi:10.1039/c4cp03783a), 2015-01-01
Supplement: c4cp03783a1.pdf [file c4cp03783a1.pdf]

# Supporting Information for Oxygen-induced changes to selectivity-determining steps in electrocatalytic CO<sub>2</sub> reduction

Yin-Jia Zhang<sup>1</sup>, Andrew A. Peterson<sup>2,\*</sup>

<sup>1</sup>Department of Chemistry and <sup>2</sup>School of Engineering, Brown University, Providence, Rhode Island,  
02912, United States.

\*andrew\_peterson@brown.edu

**Table 1:** Chemical potentials of non-adsorbed molecules at 25°C, including electronic potential energy, zero-point energy, enthalpic temperature correction and entropy contribution. CH<sub>3</sub>OH was calculated at the fugacity where liquid-vapor equilibrium is reached. CH<sub>4</sub> and H<sub>2</sub> were treated as ideal gas and were calculated at the atmosphere pressure. H<sub>2</sub> (ref) is used for evaluating the chemical potential of (H<sup>+</sup> + e<sup>-</sup>) by CHE model.

| Molecule             | Fugacity<br>Pa | $E_{\text{elec}}$<br>eV | ZPE<br>eV | $\int C_p dT$<br>eV | $-TS$<br>eV | $\mu$<br>eV |
|----------------------|----------------|-------------------------|-----------|---------------------|-------------|-------------|
| CH <sub>3</sub> OH   | 13020          | -657.181                | 1.370     | 0.118               | -0.790      | -656.484    |
| CH <sub>4</sub>      | 101325         | -220.739                | 1.194     | 0.104               | -0.575      | -220.016    |
| H <sub>2</sub> (ref) | 101325         | -32.032                 | 0.275     | 0.091               | -0.403      | -32.071     |

**Table 2:** Free energy corrections of adsorbates at 25°C, including zero-point energy, enthalpic temperature correction and entropy contribution. All values are reported in eV.

| Adsorbate          | ZPE   | $\int C_p dT$ | $-TS$  | $G - E_{\text{elec}}$ |
|--------------------|-------|---------------|--------|-----------------------|
| CH <sub>3</sub> O* | 1.108 | 0.096         | -0.186 | 1.018                 |
| O*                 | 0.072 | 0.027         | -0.040 | 0.058                 |

**Table 3:** Electronic potential energies and free energies of surfaces Cu(111), Cu<sub>2</sub>O(111) and Cu(110)-(2×1)O at 25°C. All values are reported in eV.

|                        | $E_{\text{elec}}[*]$ | $G_{\text{elec}}[*]$ | $E_{\text{elec}}[\text{CH}_3\text{O}*]$ | $G[\text{CH}_3\text{O}*]$ | $E_{\text{elec}}[\text{O}*]$ | $G[\text{O}*]$ |
|------------------------|----------------------|----------------------|-----------------------------------------|---------------------------|------------------------------|----------------|
| Cu(111)                | -30275.01            | -30275.01            | -30710.92                               | -30710.86                 | -30915.91                    | -30914.89      |
| Cu <sub>2</sub> O(111) | -45196.10            | -45196.10            | -45632.72                               | -45632.66                 | -45836.97                    | -45835.95      |
| Cu(110)-(2×1)O         | -44396.86            | -44396.86            | -44832.56                               | -44832.50                 | -45036.67                    | -45035.65      |

**Table 4:** Binding energies of O on Cu(111) surface with specified coverage of OH and CO spectators co-adsorbed.

|    | Coverage<br>ML | $E_{\text{elec}}[\text{O}* + x\text{OH}]$<br>eV | $E_{\text{elec}}[x\text{OH} + *]$<br>eV | $E_{\text{B}}[\text{O}]$<br>eV | $\Delta E_{\text{B}}[\text{O}]$<br>eV |
|----|----------------|-------------------------------------------------|-----------------------------------------|--------------------------------|---------------------------------------|
| OH | 0              | -45632.716                                      | -45196.104                              | 1.087                          | 0.000                                 |
|    | 1/9            | -46086.150                                      | -45649.451                              | 1.000                          | -0.087                                |
|    | 2/9            | -46539.453                                      | -46102.742                              | 0.988                          | -0.099                                |
|    | 3/9            | -46992.589                                      | -46555.974                              | 1.084                          | -0.003                                |
|    | 4/9            | -47445.277                                      | -47009.356                              | 1.778                          | 0.691                                 |
| CO | 0              | -45632.716                                      | -45196.104                              | 1.087                          | 0.000                                 |
|    | 1/9            | -46224.573                                      | -45787.906                              | 1.033                          | -0.055                                |
|    | 2/9            | -46816.394                                      | -46379.867                              | 1.172                          | 0.085                                 |
|    | 3/9            | -47408.116                                      | -46971.514                              | 1.097                          | 0.010                                 |
|    | 4/9            | -47999.766                                      | -47563.237                              | 1.171                          | 0.084                                 |

**Table 5:** Binding energies of CH<sub>3</sub>O on Cu(111) surface with a certain coverage of OH and CO spectators co-adsorbed.

|    | Coverage<br>ML | $E_{\text{elec}}[\text{CH}_3\text{O}^* + x\text{OH}]$<br>eV | $E_{\text{elec}}[x\text{OH} + ^*]$<br>eV | $E_{\text{B}}[\text{CH}_3\text{O}]$<br>eV | $\Delta E_{\text{B}}[\text{CH}_3\text{O}]$<br>eV |
|----|----------------|-------------------------------------------------------------|------------------------------------------|-------------------------------------------|--------------------------------------------------|
| OH | 0              | -45836.969                                                  | -45196.104                               | 0.300                                     | 0.000                                            |
|    | 1/9            | -46290.321                                                  | -45649.448                               | 0.294                                     | -0.007                                           |
|    | 2/9            | -46743.632                                                  | -46102.719                               | 0.253                                     | -0.047                                           |
|    | 3/9            | -47196.954                                                  | -46556.107                               | 0.319                                     | 0.019                                            |
|    | 4/9            | -47649.886                                                  | -47009.356                               | 0.635                                     | 0.335                                            |
| CO | 0              | -45836.969                                                  | -45196.104                               | 0.300                                     | 0.000                                            |
|    | 1/9            | -46428.845                                                  | -45787.954                               | 0.275                                     | -0.025                                           |
|    | 2/9            | -47020.717                                                  | -46379.867                               | 0.316                                     | 0.016                                            |
|    | 3/9            | -47612.358                                                  | -46971.641                               | 0.449                                     | 0.148                                            |
|    | 4/9            | -48203.550                                                  | -47563.247                               | 0.863                                     | 0.563                                            |

**Table 6:** Vibrational modes of adsorbates on copper surface, from [?].

| O*        |               |                          | CH <sub>3</sub> O* |               |                          |
|-----------|---------------|--------------------------|--------------------|---------------|--------------------------|
| mode<br># | energy<br>meV | freq<br>cm <sup>-1</sup> | mode<br>#          | energy<br>meV | freq<br>cm <sup>-1</sup> |
| 0         | 39.3          | 317.0                    | 0                  | 8.8           | 71.0                     |
| 1         | 49.5          | 399.5                    | 1                  | 18.3          | 147.6                    |
| 2         | 54.7          | 441.5                    | 2                  | 20.8          | 167.9                    |
|           |               |                          | 3                  | 25.4          | 205.1                    |
|           |               |                          | 4                  | 37.2          | 300.4                    |
|           |               |                          | 5                  | 38.1          | 307.4                    |
|           |               |                          | 6                  | 128.0         | 1032.5                   |
|           |               |                          | 7                  | 141.2         | 1138.6                   |
|           |               |                          | 8                  | 143.0         | 1153.4                   |
|           |               |                          | 9                  | 179.3         | 1446.5                   |
|           |               |                          | 10                 | 180.4         | 1455.1                   |
|           |               |                          | 11                 | 180.7         | 1457.4                   |
|           |               |                          | 12                 | 367.1         | 2960.5                   |
|           |               |                          | 13                 | 373.1         | 3009.0                   |
|           |               |                          | 14                 | 375.4         | 3027.9                   |

**Table 7:** Vibration modes of non-adsorbed molecules. Note that the lowest six (in the case of CH<sub>3</sub>OH, CH<sub>4</sub>) or five (H<sub>2</sub>) modes are ignored, as these are translational and rotational degrees of freedom treated with standard statistical mechanics techniques for ideal gases.

| <b>CH<sub>3</sub>OH</b> |            |                       | <b>CH<sub>4</sub></b> |            |                       | <b>H<sub>2</sub></b> |            |                       |
|-------------------------|------------|-----------------------|-----------------------|------------|-----------------------|----------------------|------------|-----------------------|
| mode #                  | energy meV | freq cm <sup>-1</sup> | mode #                | energy meV | freq cm <sup>-1</sup> | mode #               | energy meV | freq cm <sup>-1</sup> |
| 0                       | 7.9i       | 63.8i                 | 0                     | 17.8i      | 143.4i                | 0                    | 14.6       | 117.6                 |
| 1                       | 3.9        | 31.7                  | 1                     | 16.9i      | 136.6i                | 1                    | 19.2       | 154.8                 |
| 2                       | 6.4        | 51.8                  | 2                     | 14.0i      | 112.6i                | 2                    | 21.3       | 172.1                 |
| 3                       | 10.9       | 88.0                  | 3                     | 10.7i      | 86.2i                 | 3                    | 31.6       | 254.5                 |
| 4                       | 12.2       | 98.2                  | 4                     | 10.1       | 81.5                  | 4                    | 40.1       | 323.6                 |
| 5                       | 13.7       | 110.7                 | 5                     | 16.2       | 130.3                 | 5                    | 549.2      | 4429.8                |
| 6                       | 39.0       | 314.4                 | 6                     | 159.8      | 1289.1                |                      |            |                       |
| 7                       | 124.3      | 1002.8                | 7                     | 160.2      | 1291.8                |                      |            |                       |
| 8                       | 130.3      | 1050.8                | 8                     | 160.6      | 1295.1                |                      |            |                       |
| 9                       | 140.5      | 1133.4                | 9                     | 186.9      | 1507.4                |                      |            |                       |
| 10                      | 164.2      | 1324.3                | 10                    | 187.5      | 1512.2                |                      |            |                       |
| 11                      | 177.8      | 1434.0                | 11                    | 372.1      | 3001.5                |                      |            |                       |
| 12                      | 180.3      | 1454.1                | 12                    | 387.1      | 3121.8                |                      |            |                       |
| 13                      | 181.5      | 1464.2                | 13                    | 387.2      | 3123.1                |                      |            |                       |
| 14                      | 366.3      | 2954.6                | 14                    | 387.5      | 3125.6                |                      |            |                       |
| 15                      | 373.4      | 3011.5                |                       |            |                       |                      |            |                       |
| 16                      | 383.0      | 3089.2                |                       |            |                       |                      |            |                       |
| 17                      | 479.1      | 3864.2                |                       |            |                       |                      |            |                       |
